# Supplementary material for: Multidisciplinary meeting review in nonsmall cell lung cancer: a systematic review and meta-analysis
Source: PubMed Central journal article supplement — Eur Respir Rev. 2024 May 8;33(172):230157. doi: 10.1183/16000617.0157-2023 (PMC11078104; doi:10.1183/16000617.0157-2023), 2024-05-08
Supplement: ERR-0157-2023.supplementary_analyses.pdf [file ERR-0157-2023.supplementary_analyses.pdf]

## **Supplementary Analyses: Outcomes by subgroup**

### **Supplement 1. Histological confirmation of diagnosis**

**By stage:** studies included were all stage patients

**By study type:** all studies were multicentre hospital networks or state-based registries

**By intervention type:** all studies were MDM meetings

### **Supplement 2. Clinical staging**

**By stage:** not applicable

**By study type:** all studies were multicentre hospital networks or state-based registries

**By intervention type:** all studies were MDM meetings

### Supplement 3. Patients who undergo surgery

**By stage:** studies included were all stage patients

**By study type:** Receipt of surgery was increased by MDM presentation independent of study type OR 1.91(1.13-3.22), p=0.02.

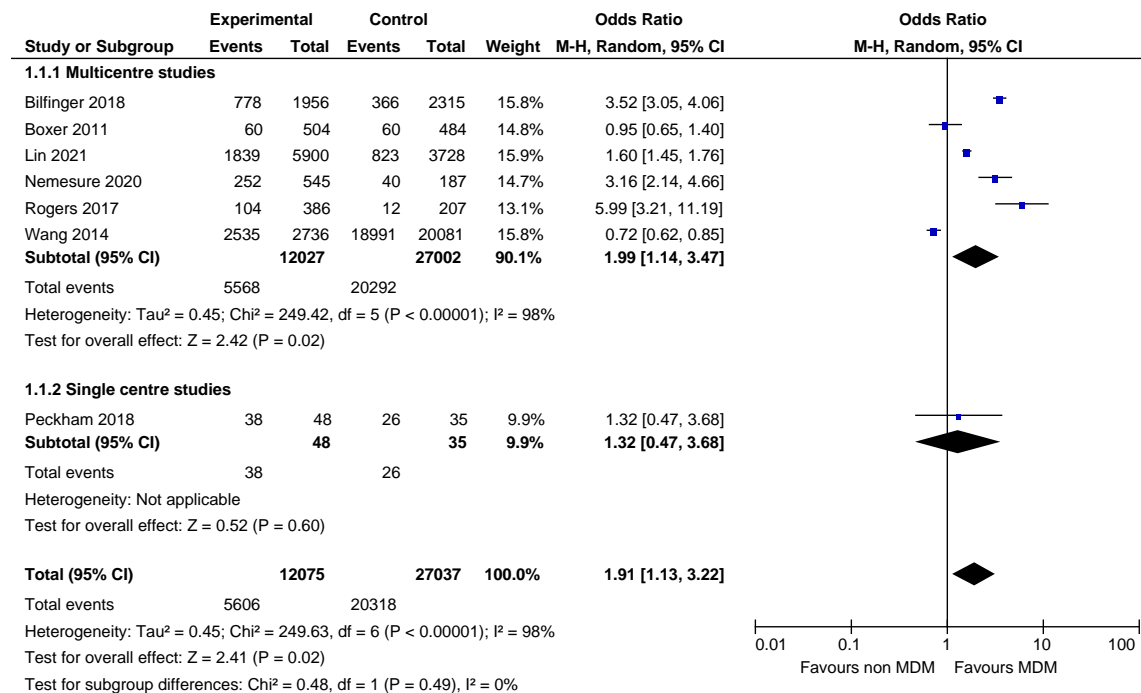

**By intervention type:** Receipt of surgery was increased by MDM presentation independent of intervention type OR 1.91(1.13-3.22), p=0.02.

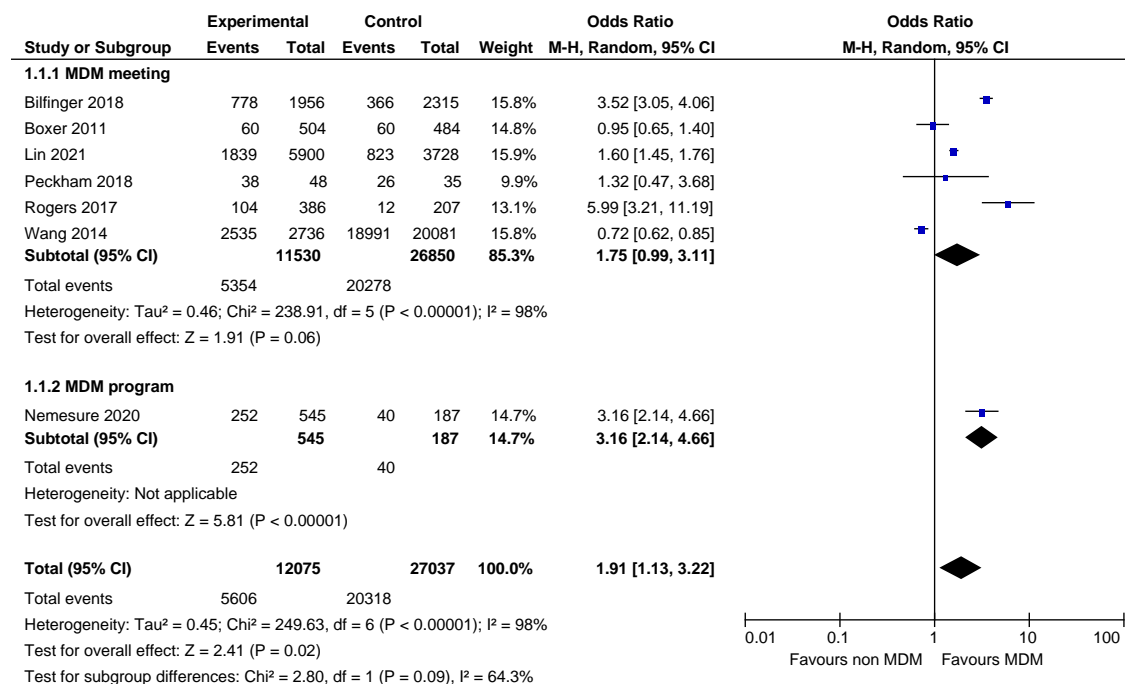

## Receipt of radiotherapy

**By stage:** studies included were all stage patients

**By study type:** Receipt of radiotherapy was not affected by MDM presentation independent of study type OR 1.35(0.85-2.17), p=0.21.

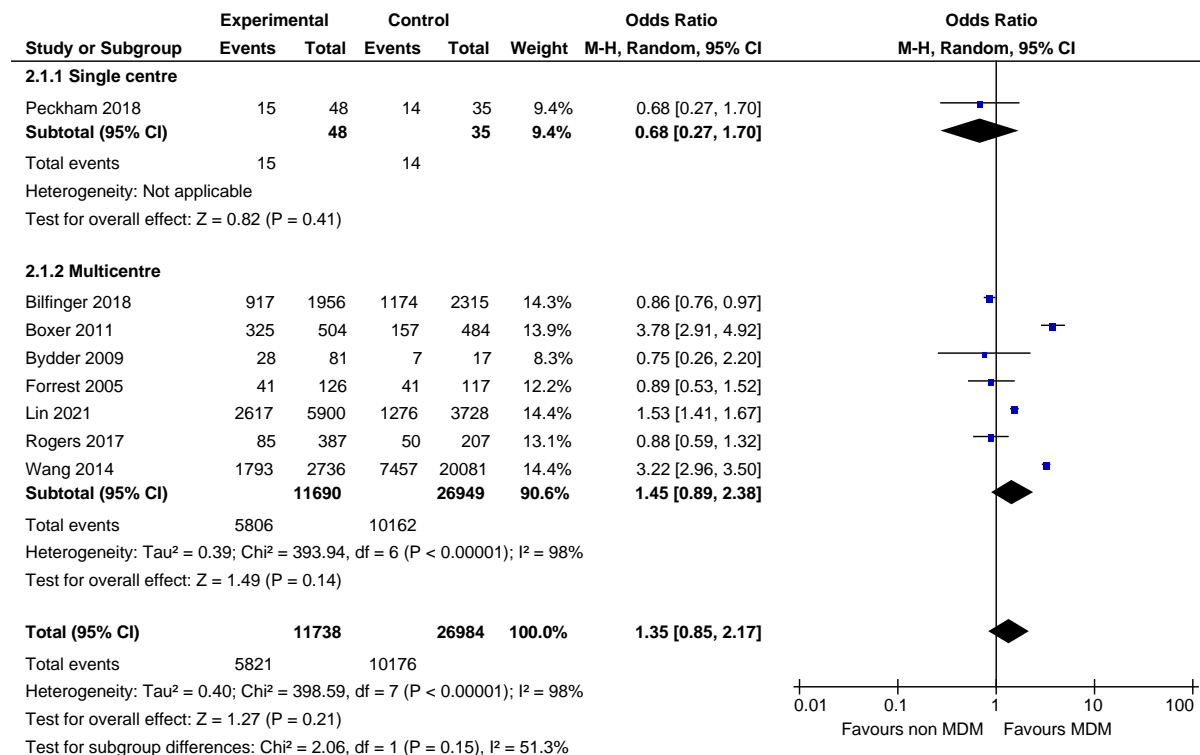

**By intervention type:** Receipt of radiotherapy was not affected by MDM presentation independent of intervention type OR 1.35(0.85-2.17), p=0.21.

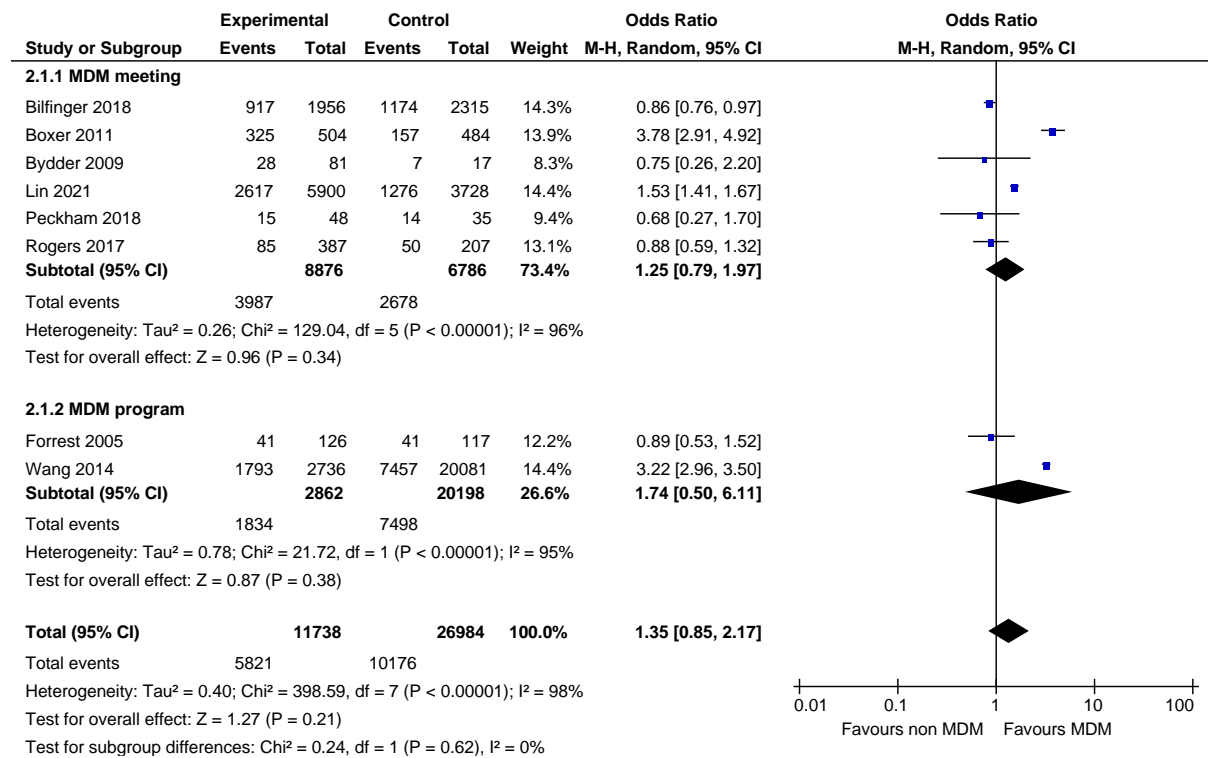

## Receipt of chemotherapy

**By stage:** Receipt of chemotherapy was not affected by MDM presentation independent of stage OR 1.67(0.98-2.83), p=0.06.

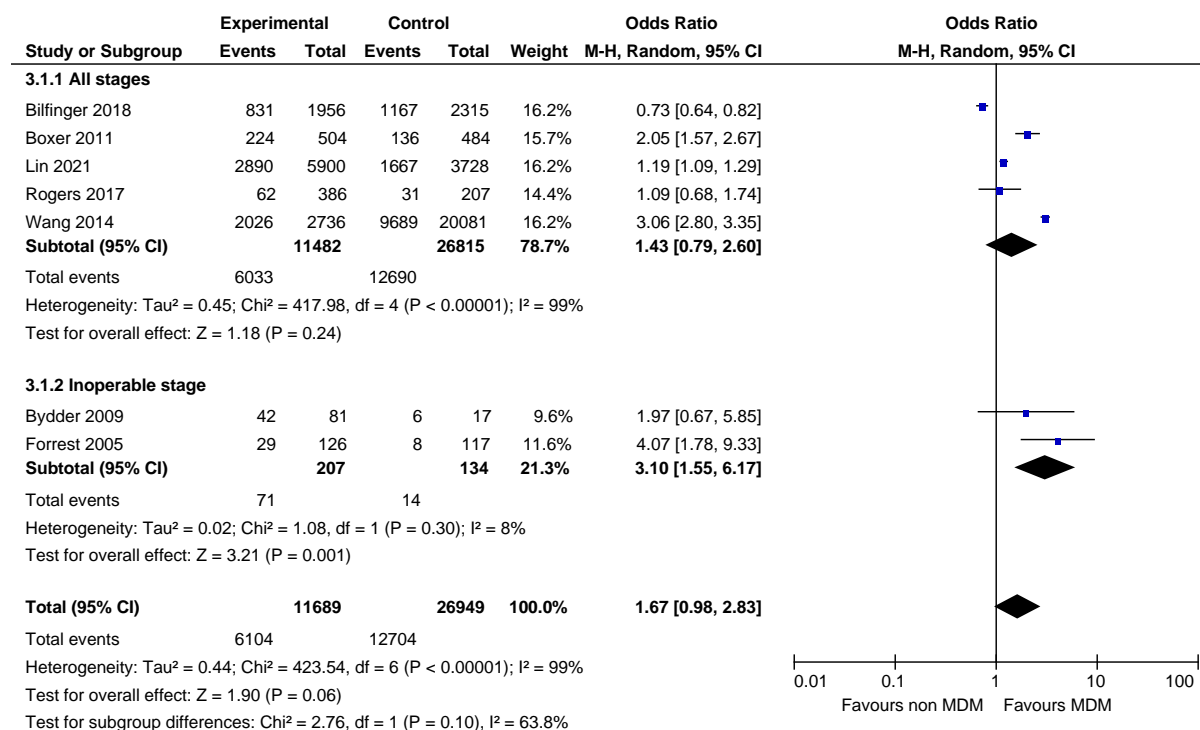

**By study type:** Receipt of chemotherapy was not affected by MDM presentation independent of study type OR 1.67(0.98-2.83), p=0.06.

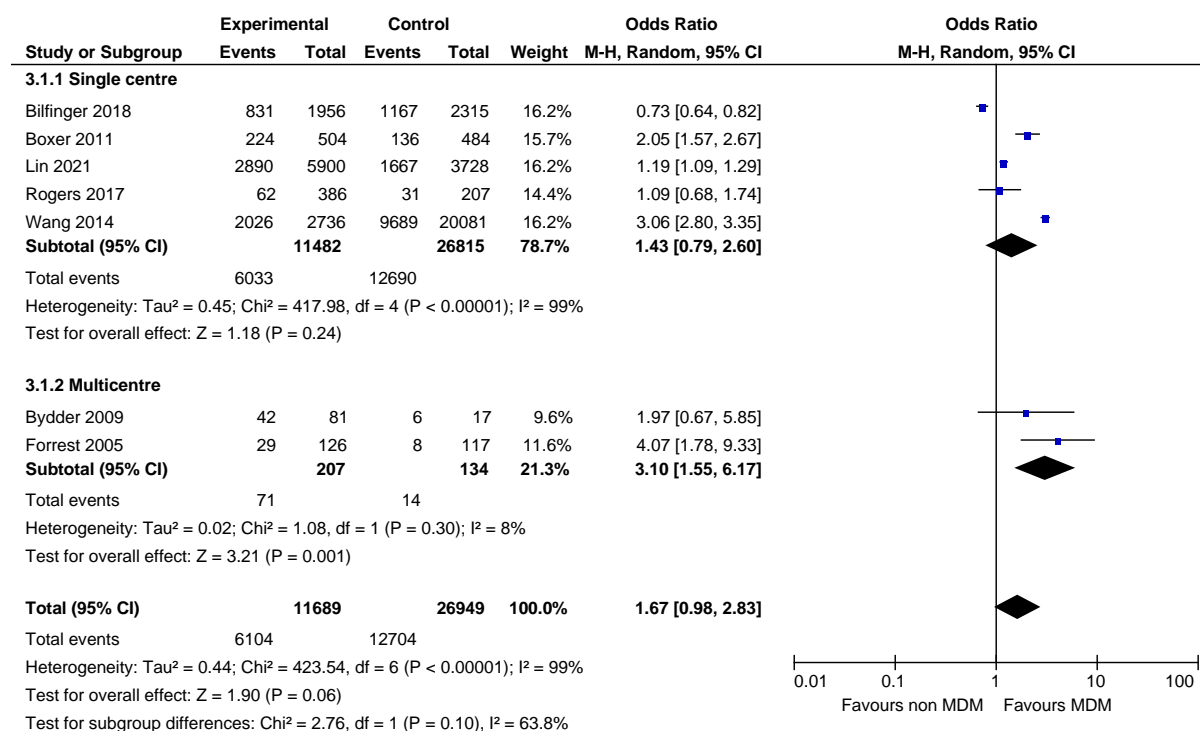

**By intervention type:** Receipt of chemotherapy was not affected by MDM presentation independent of intervention type OR 1.67(0.98-2.83), p=0.06.

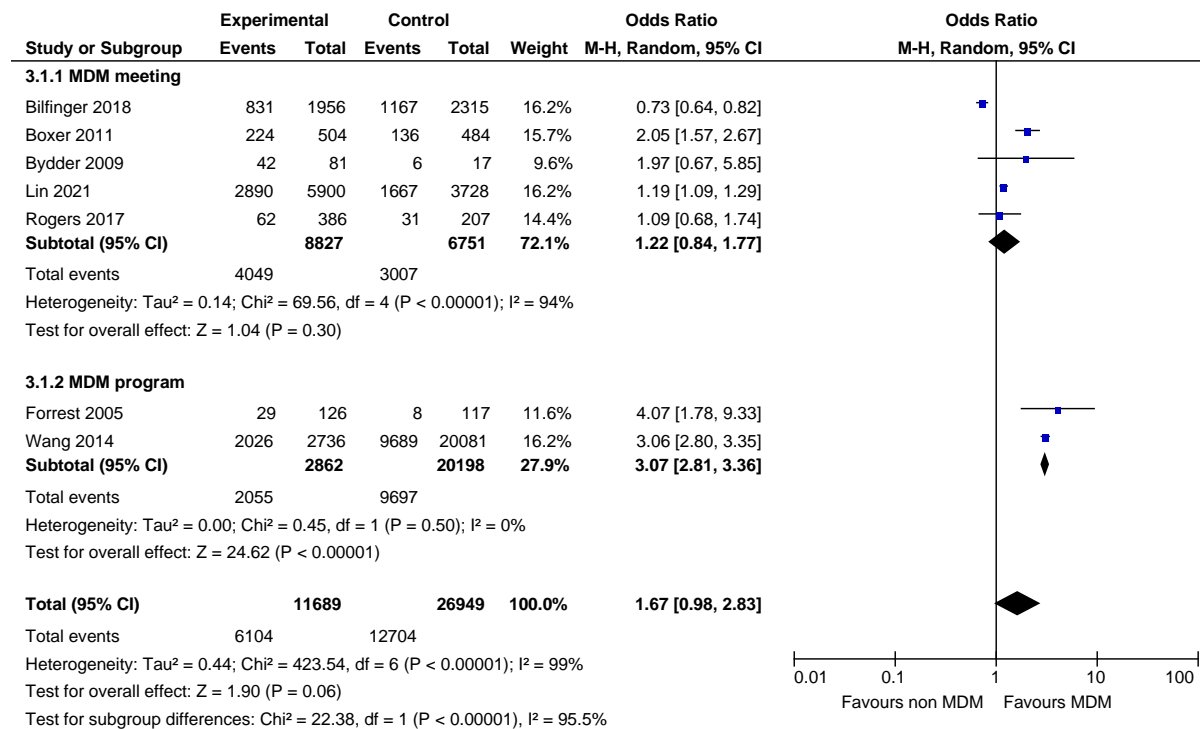

## Palliative care evaluation

**By stage:** studies included were all stage patients

**By study type:** Receipt of palliative care was not affected by MDM presentation independent of study type OR 0.94(0.48-1.85), p=0.86.

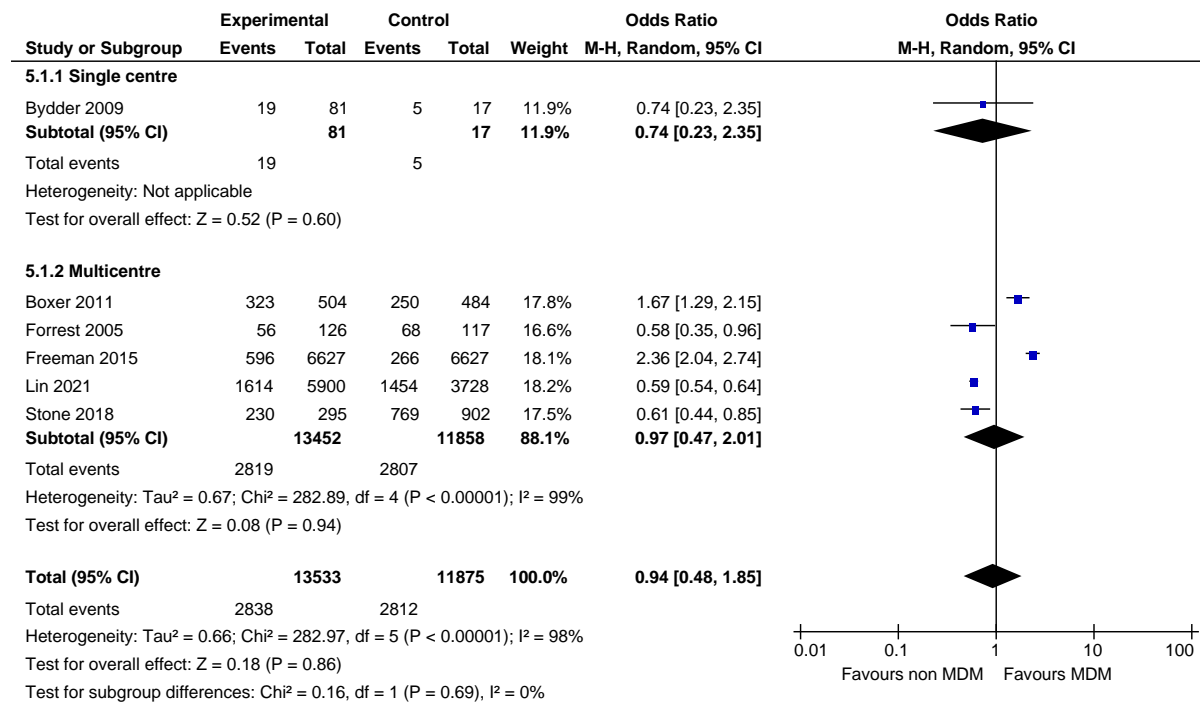

**By intervention type:** Receipt of palliative care was not affected by MDM presentation independent of intervention type OR 0.94(0.48-1.85), p=0.86.

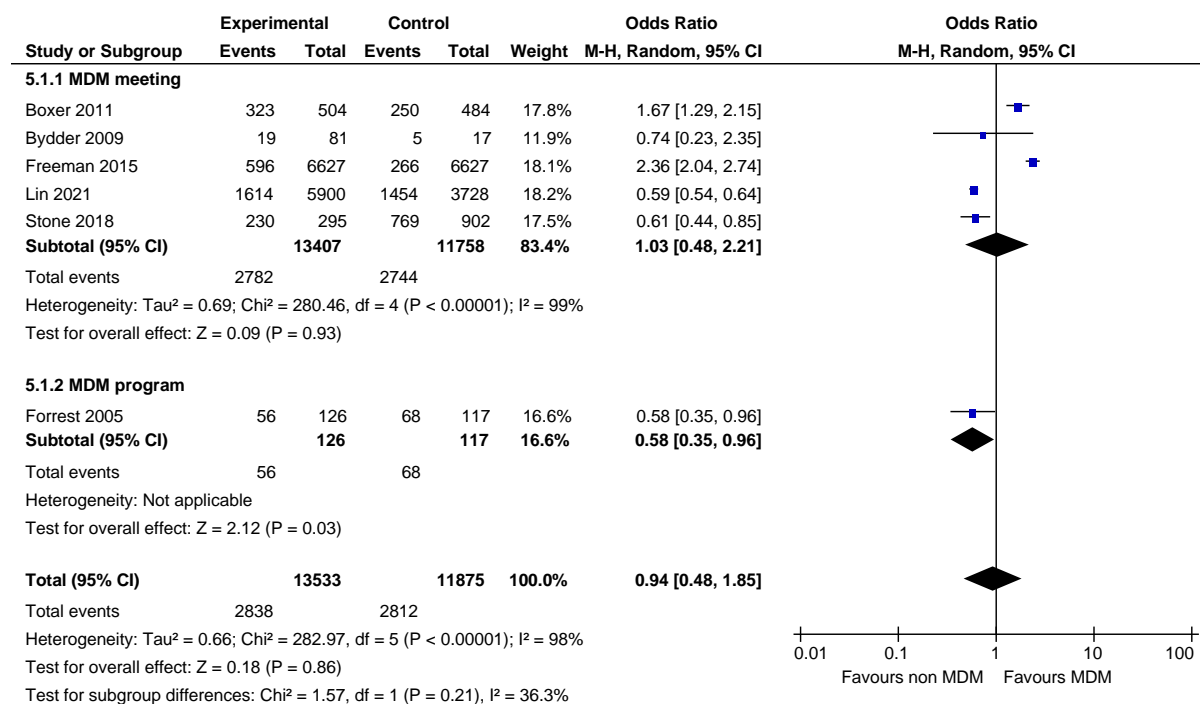

#### **Supplement 4. Clinical trial enrolment**

**By stage:** studies included were all stage patients

**By study type:** all studies are multicentre

**By intervention type:** all studies were MDM meeting interventions

#### **Supplement 5. Overall survival**

**By stage:** studies included were all stage patients

**By study type:** all studies are multicentre

**By intervention type:** all studies were MDM meeting interventions
