# Supplementary material for: Multidisciplinary meeting review in nonsmall cell lung cancer: a systematic review and meta-analysis
Source: PubMed Central journal article supplement — Eur Respir Rev. 2024 May 8;33(172):230157. doi: 10.1183/16000617.0157-2023 (PMC11078104; doi:10.1183/16000617.0157-2023), 2024-05-08
Supplement: ERR-0157-2023.table_S1.pdf [file ERR-0157-2023.table_S1.pdf]

## Supplementary Table S1. Medline Search Strategy:

1. Patient Care Team/
2. (Multidisciplinary team\* OR Multi-disciplinary team\* OR Multi disciplinary team\* OR Health care team\* OR Healthcare team\* OR Medical care team\* OR Patient care team\* OR (Interdisciplinary health ADJ1 team\*) OR (Inter-disciplinary health ADJ1 team\*) OR (Multidisciplinary ADJ1 health team\*) OR (Multi-disciplinary ADJ1 health team\*) OR (Multi disciplinary ADJ1 team\*) OR (Collaborative ADJ1 team\*) OR Interdisciplinary treatment approach\* OR Inter-disciplinary treatment approach\* OR Tumour board\* OR Tumor board\* OR Multidisciplinary meeting\* OR Multi-disciplinary meeting\* OR multi disciplinary meeting\* OR Interdisciplinary health ADJ1 meeting\*) OR (Inter-disciplinary health ADJ1 meeting\*) OR (Multidisciplinary ADJ1 health meeting\*) OR (Multi-disciplinary ADJ1 health meeting\*) OR (Multi disciplinary ADJ1 meeting\*) OR (Collaborative ADJ1 meeting\*) OR case discussion\* OR multi-disciplinary discussion OR Multi-disciplinary discussion\* OR Multi disciplinary discussion OR (Interdisciplinary health ADJ1 discussion\*) OR (Inter-disciplinary health ADJ1 discussion\*) OR (Multidisciplinary ADJ1 health discussion\*) OR (Multi-disciplinary ADJ1 health discussion\*) OR (Multi disciplinary ADJ1 discussion\*) OR integrated care model\* OR patient care model\*).mp.
3. 1 or 2
4. lung neoplasms/ or "adenocarcinoma of lung"/ or adenocarcinoma, bronchiolo-alveolar/ or bronchial neoplasms/ or carcinoma, bronchogenic/ or carcinoma, non-small-cell lung/ or small cell lung carcinoma/ or pancoast syndrome/ or pleural effusion, malignant/
5. (Lung neoplasm\* OR (Adenocarcinoma ADJ2 lung\*) OR Lung adenocarcinoma\* OR Bronchiolo-Alveol\* Adenocarcinoma\* OR Bronchiolo alveol\* adenocarcinoma\* OR Bronchiolo-alveol\* carcinoma\* OR Bronchiolo alveol\* carcinoma OR Bronchioloalveol\* carcinoma OR Alveol\* adenocarcinoma\* OR Alveol\* carcinoma\* OR Alveol\* cell carcinoma\* OR Bronchiol\* carcinoma\* OR Bronch\* neoplasm\* OR Bronch\* carcinoma\* OR Pancoast\* syndrome\* OR Pancoast\* tumor\* OR Bronchogenic carcinoma\* OR Bronchiogenic carcinoma\* OR Non-small-cell lung carcinoma\* OR Non-small cell lung carcinoma\* OR Nonsmall cell lung carcinoma\* OR Non small cell lung carcinoma\* OR Non-small-cell lung cancer\* OR Non-small cell lung cancer\* OR Nonsmall cell OR lung cancer\* OR Non small cell lung cancer\* OR Non-small-cell bronch\* cancer\* OR Non-small cell bronch\* cancer\* OR Nonsmall cell bronch\* cancer\* OR Non small cell bronch\* cancer\* OR Non-small-cell bronch\* carcinoma\* OR Non-small cell bronch\* carcinoma\* OR Nonsmall cell bronch\* carcinoma\* OR Non small cell bronch\* carcinoma\* OR Non-small-cell pulmonary carcinoma\* OR Non-small cell pulmonary carcinoma\* OR Nonsmall cell pulmonary carcinoma\* OR Non small cell pulmonary carcinoma\* OR Non-small-cell pulmonary cancer\* OR Non-small cell pulmonary cancer\* OR Nonsmall cell pulmonary cancer\* OR Non small cell pulmonary cancer\* OR Small-cell lung cancer\* OR Small cell lung cancer\* OR Small-cell lung carcinoma\* OR Small cell lung carcinoma\* OR Oat cell lung carcinoma\* OR Oat cell lung cancer\* OR Oat cell carcinoma\* of lung\* OR Lung cancer\* OR

Pulmonary cancer\* OR Cancer ADJ2 lung\* OR Pulmonary neoplasm\* OR Peribronch\* carcinoma\* OR Peri-bronch\* carcinoma\* OR Respiratory tract carcinoma\* OR Respiratory tract cancer\* OR (Lung ADJ2 carcinoma\*) OR Large cell lung cancer\* OR Large cell lung carcinoma\* OR Squamous cell lung carcinoma\* OR Squamous cell lung cancer\* OR Lung alveol\* cell carcinoma\* OR Lung alveol\* cell cancer\* OR Invasive lung carcinoma\* OR Invasive lung cancer\*).mp.

6. 4 or 5

7. 3 and 6

8. exp animals/ not humans.sh.

9. 7 not 8
